# Supplementary material for: A flexible conductive film prepared by the oriented stacking of Ag and Au/Ag alloy nanoplates and its chemically roughened surface for explosive SERS detection and cell adhesion
Source: Royal Society of Chemistry journal article supplement (doi:10.1039/c6ra25956a), 2017-01-01
Supplement: c6ra25956a1.pdf [file c6ra25956a1.pdf]

## Supporting Information

### Flexible Conductive Film by Oriented Stacking of Ag and Au/Ag Alloy Nanoplates and its Surface Chemically Roughening for Explosive SERS Detection and Cell Adhesion

Mingming Sun, Hongmei Qian, Jia Liu, Yuchuan Li, Siping Pang, Meng Xu\* and  
Jiatao Zhang\*

**Addition figures and table:**

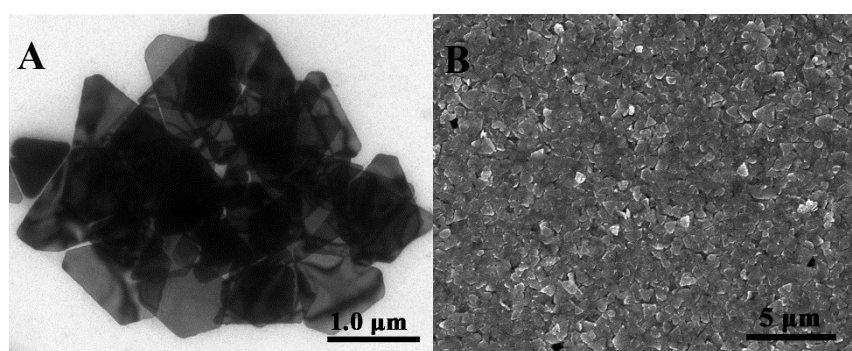

**Fig. S1** (A) The TEM image of the pure Ag nanoplates. (B) The SEM image of Au-Ag alloy nanoplates on the PET transparent film after in-situ conversion.

**Table S1.** The resistance of different bending degree from Ag film.

|                        | Line 1 | Line 2 | Line 3 | Line 4 | Line 5 |
|------------------------|--------|--------|--------|--------|--------|
| $L_0$ (cm)             | 2      | 2      | 2      | 2      | 2      |
| L (cm)                 | 2      | 1.6    | 1.4    | 1.0    | 0.8    |
| Bending degree         | 1      | 0.8    | 0.7    | 0.5    | 0.4    |
| Resistance( $\Omega$ ) | 107    | 108    | 113    | 119    | 113    |

The Line 1 is the original Ag nanoplates film without any bending. The Line 2-5 are resistances of different extent. The variation range is from 107-119  $\Omega$ .

**Table S2.** The resistance of different bending degree from Au-Ag film.

|                        | Line 1 | Line 2 | Line 3 | Line 4 | Line 5 |
|------------------------|--------|--------|--------|--------|--------|
| $L_0$ (cm)             | 2      | 2      | 2      | 2      | 2      |
| L (cm)                 | 2      | 1.6    | 1.4    | 1.0    | 0.8    |
| Bending degree         | 1      | 0.8    | 0.7    | 0.5    | 0.4    |
| Resistance( $\Omega$ ) | 10.3   | 10     | 10.5   | 10.1   | 10.3   |

The Line 1 is the original Au-Ag alloy film without any bending. The Line 2-5 are resistances of different extent. The variation range is from 10-10.5  $\Omega$ , which is comparatively stable for application.

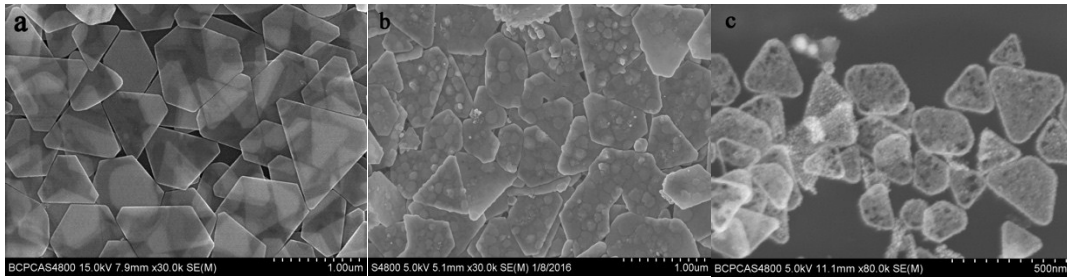

**Fig. S2** The SEM images of Au-Ag alloy nanoplates surface roughness evolution. (a) The original smooth Ag nanoplates; introducing different quantity of  $\text{HAuCl}_4$  solution (0.2 mM/mL) into the Ag nanoplate colloids: (b) 10 mL, (c) 20 mL.

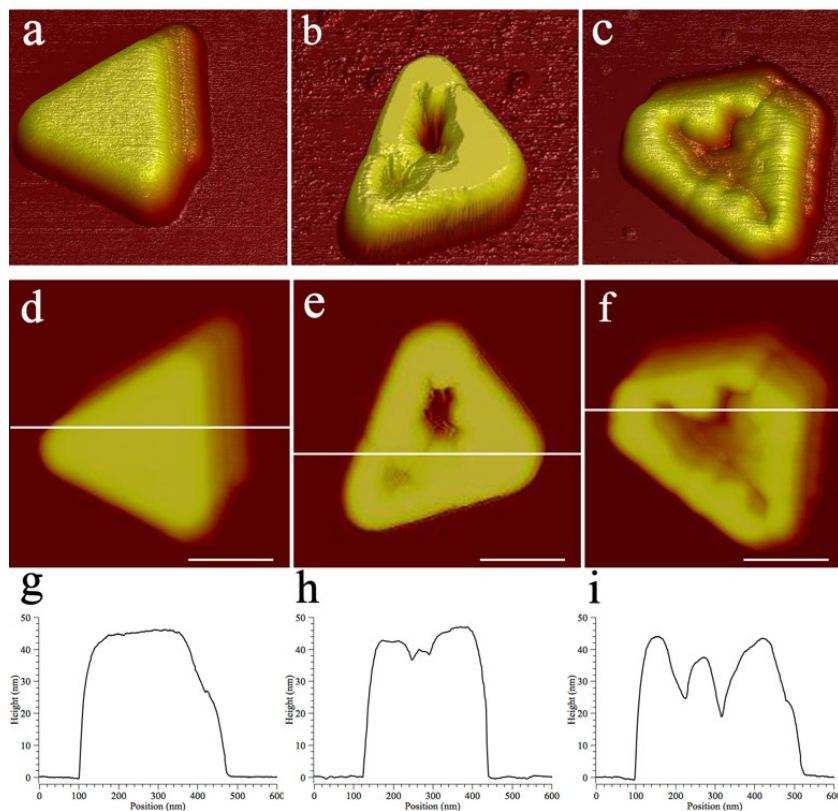

**Fig. S3** The 3D (a-c) and 2D (d-e) AFM images and corresponding cross-sectional profiles (g-h) along the white line, respectively, of the Ag nanoplate and Au-Ag alloy nanoplate. Scan bars: 300 nm.

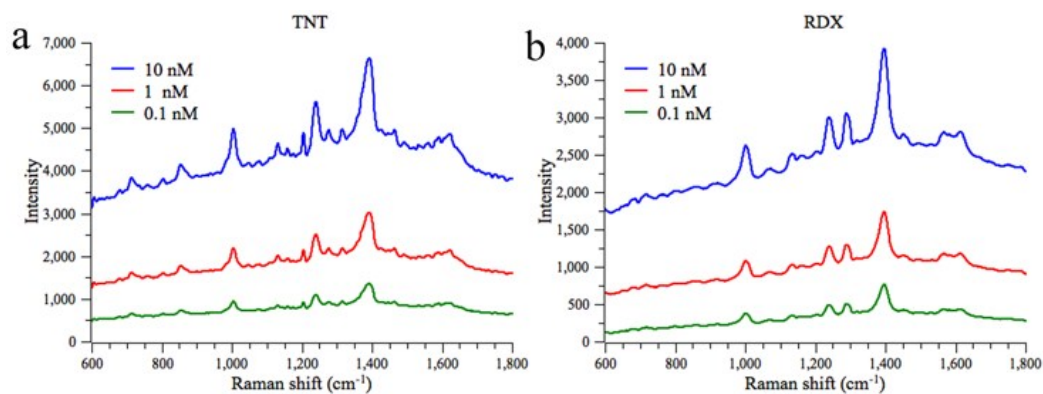

**Fig. S4** SERS spectra of different concentrations of TNT (a) and RDX (b) molecules.

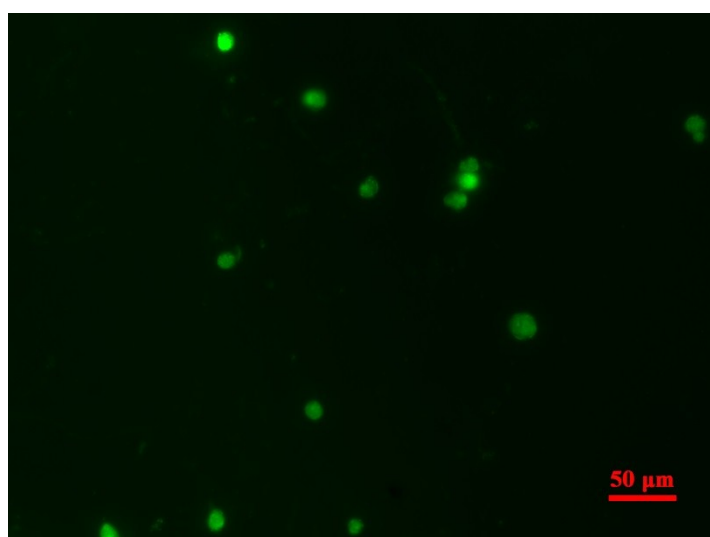

**Fig. S5** The fluorescence microscopy images of NIH 3T3 cells cultured on pure Ag substrate. Those cells have sphere morphologies without any filopodias. Those cells have a low concentration compared with Au-Ag alloy substrate.

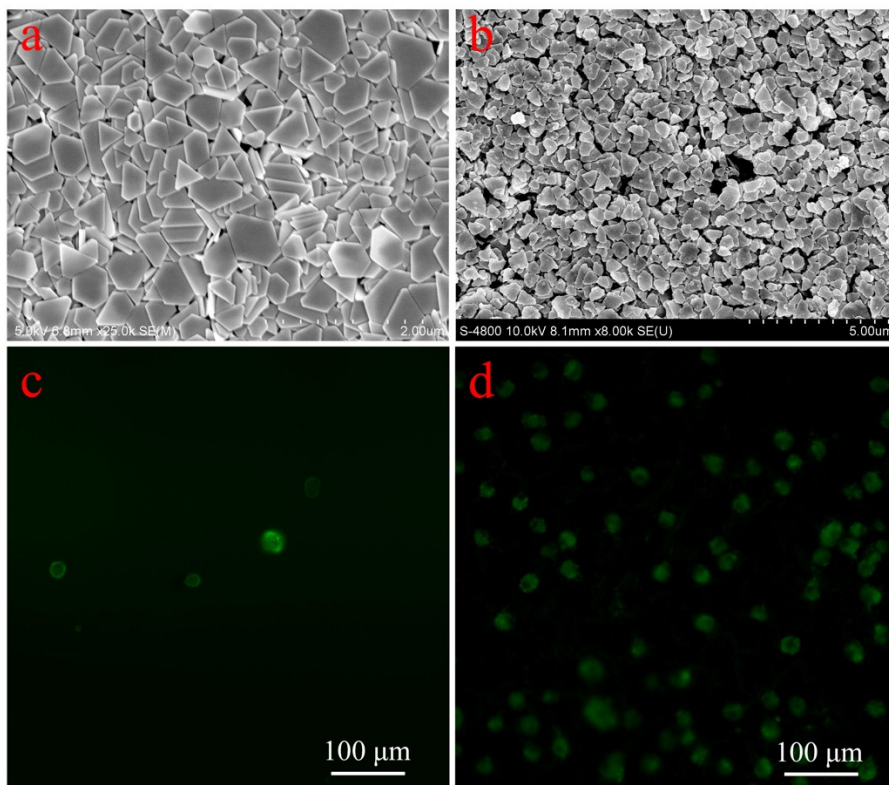

**Fig. S6** SEM images of random-oriented Ag (a) and Au-Ag nanoplates (b)-built films, respectively. Fluorescence microscopy images of NIH 3T3 cells on random-oriented Ag (c) and Au-Ag nanoplates (d)-built films, respectively.
